# Supplementary material
Source: PubMed Central journal article supplement (PMC10526691)
Supplement: NIHMS1908362-supplement-Machine_learning_checklist.pdf [file NIHMS1908362-supplement-Machine_learning_checklist.pdf]

## Guidelines for Developing and Reporting Machine Learning Predictive Models in Biomedical Research: A Multidisciplinary View -- Checklist

Adapted from: Luo W, Phung D, Tran T, Gupta S, Rana S, Karmakar C, Shilton A, Yearwood J, Dimitrova N, Ho TB, Venkatesh S. Guidelines for developing and reporting machine learning predictive models in biomedical research: a multidisciplinary view. *Journal of medical Internet research*. 2016 Dec 16;18(12):e5870. doi: [10.2196/jmir.5870](https://doi.org/10.2196/jmir.5870)

For each row, indicate the page number where the topic is addressed, or enter "NA" if not applicable.

| Item Number | Section      | Topic                           | Checklist Item                                                                                                                                                                                                                                   | Page                                          |
|-------------|--------------|---------------------------------|--------------------------------------------------------------------------------------------------------------------------------------------------------------------------------------------------------------------------------------------------|-----------------------------------------------|
| 1           | Title        | Nature of study                 | Identify the report as introducing a predictive model                                                                                                                                                                                            | Title page                                    |
| 2           | Abstract     | Structured summary              | Include abstract formatted correctly for <i>Stroke</i> , identifying data sources, performance metrics of the predictive models (including point estimates and confidence intervals), and conclusion including the practical value of the models | 1-2                                           |
| 3           | Introduction | Rationale                       | Identify the clinical goal, including how the prediction problem may benefit the clinical goal                                                                                                                                                   | Page 3, line 78-90                            |
| 4           |              | Rationale                       | Review the current practice and prediction accuracy of any existing models                                                                                                                                                                       | Page 4, line 91-99                            |
| 5           |              | Objectives                      | State the nature of study being predictive modeling, defining the target of prediction                                                                                                                                                           | Page 4, line 100-102                          |
| 6           | Methods      | Data availability               | Report the conditions under which other investigators can access the models and data, following AHA TOP guidelines at <a href="https://www.ahajournals.org/submission-requirements">https://www.ahajournals.org/submission-requirements</a>      | Page 9, line 202-205                          |
| 7           |              | Describe the setting            | Identify the clinical setting for the target predictive model, including facility type, size, volume, and time period.                                                                                                                           | Page 4, line 106-120                          |
| 8           |              |                                 | Determine that the study is retrospective or prospective.                                                                                                                                                                                        | Page 4, line 108-109;<br>Page 5, line 114-116 |
| 9           |              | Define the prediction problem   | Determine the form of the prediction model: (1) classification if the target variable is categorical, (2) regression if the target variable is continuous, (3) survival prediction if the target variable is the time to an event.               | Page 6, line 138-151                          |
| 10          |              |                                 | Define the success criteria for prediction (e.g., based on metrics in internal validation or external validation) in the context of the clinical problem                                                                                         | Page 7, line 173-180                          |
| 11          |              | Prepare data for model building | Identify relevant data sources for derivation and validation and quote the ethics approval number for data access.                                                                                                                               | Page 6, line 152-172                          |
| 12          |              |                                 | State the inclusion and exclusion criteria for data.                                                                                                                                                                                             | Page 4, line 111-112; page                    |

|    |  |                            |                                                                                                                                                                                                                                                                                           |                                   |
|----|--|----------------------------|-------------------------------------------------------------------------------------------------------------------------------------------------------------------------------------------------------------------------------------------------------------------------------------------|-----------------------------------|
|    |  |                            |                                                                                                                                                                                                                                                                                           | 5, 117-119.                       |
| 13 |  |                            | Describe the time span of data and the sample size.                                                                                                                                                                                                                                       | Page 4, line 110; page 9, 208-214 |
| 14 |  |                            | Define the observational units on which the response variable and predictor variables are defined.                                                                                                                                                                                        | Page 7, line 173-180              |
| 15 |  |                            | Define the predictor variables. Caution is needed to prevent information leakage from the response variable to predictor variables                                                                                                                                                        | n/a                               |
| 16 |  |                            | Describe the data preprocessing, including data cleaning and transformation. State any criteria used for outlier removal.                                                                                                                                                                 | Page 6, line 152-172              |
| 17 |  |                            | State how missing values were handled and the amount of missing data.                                                                                                                                                                                                                     | n/a                               |
| 18 |  |                            | Describe the basic statistics of the datasets, including derivation and validation, particularly of the response variable. These include the ratio of positive to negative classes for a classification problem and the distribution of the response variable for regression problem.     | Page 7, line 173-180              |
| 19 |  |                            | Define the model validation strategies. Internal validation is the minimum requirement; external validation should also be performed whenever possible.                                                                                                                                   | Page 7, line 173-180              |
| 20 |  |                            | Define the validation metrics. For regression problems, use the normalized root-mean-square error. For classification problems, the metrics should include sensitivity, specificity, positive predictive value, negative predictive value, area under the ROC curve, and calibration plot | Page 7, line 173-180              |
| 21 |  | Build the predictive model | Report the number of independent variables, the number of positive examples, and the number of negative examples.                                                                                                                                                                         | Page 10, line 226-238             |
| 22 |  |                            | Determine a set of candidate modeling techniques (e.g., logistic regression, random forest, or deep learning). If only one type of model was used, justify the decision for using that model.                                                                                             | Page 6, line 152-172              |
| 23 |  |                            | Define the performance metrics to select the best model                                                                                                                                                                                                                                   | Page 7, line 167-172              |
| 24 |  |                            | Specify the model selection strategy. Common methods include K-fold validation or bootstrap to estimate the lost function on a grid of candidate parameter values. For K-fold validation, proper stratification by the response variable is needed.                                       | n/a                               |
| 25 |  |                            | For model selection, include discussion on (1) balance between model accuracy and model simplicity or interpretability, and (2) the familiarity with the modeling                                                                                                                         | n/a                               |

|    |            |                                        |                                                                                                                                                                                                                                                                             |                                               |
|----|------------|----------------------------------------|-----------------------------------------------------------------------------------------------------------------------------------------------------------------------------------------------------------------------------------------------------------------------------|-----------------------------------------------|
|    |            |                                        | techniques of the end user.                                                                                                                                                                                                                                                 |                                               |
| 26 | Results    | Report the final model and performance | Report the predictive performance of the final model in terms of the validation metrics specified in the methods and identify which dataset were used to generate the data.                                                                                                 | Page 10, line 220-225; page 10, line 240- 226 |
| 27 |            |                                        | If possible, report the parameter estimates in the model and their confidence intervals. When the direct calculation of confidence intervals is not possible, report nonparametric estimates from bootstrap samples.                                                        | Page 10, line 220-225; page 10, line 240- 226 |
| 28 |            |                                        | If possible, report what variables were shown to be predictive of the response variable. State which subpopulation has the best prediction and which subpopulation is most difficult to predict.                                                                            | n/a                                           |
| 29 | Discussion | Clinical implications                  | Report the clinical implications derived from the obtained predictive performance. For example, report the dollar amount that could be saved with better prediction. How many patients could benefit from a care model leveraging the model prediction? And to what extent? | Page 12, line 282-294                         |
| 30 |            | Limitations                            | Report limitations including assumptions regarding data formats, pitfalls in interpretation, potential for biases, unexpected signs of coefficients, and generalizability.                                                                                                  | Page 15, line 352-375                         |
| 31 |            | Comparisons                            | Compare performance to other models in the literature. Base comparisons on confidence intervals, whenever possible.                                                                                                                                                         | Page 15, line 335-345                         |
